# Supplementary material for: A New Mouse Model for Mania Shares Genetic Correlates with Human Bipolar Disorder
Source: PubMed Central journal article supplement (PMC3366954; doi:10.1371/journal.pone.0038128), 2012-06-04
Supplement: pone.0038128.s002.pdf [file pone.0038128.s002.pdf]

## SUPPLEMENT S2: RT-QPCR METHODS

Table S2.1 – Experimental design

|                                                               |                                                                                                                                                                                                 |
|---------------------------------------------------------------|-------------------------------------------------------------------------------------------------------------------------------------------------------------------------------------------------|
| <i>Definition of experimental and control groups</i>          | Experimental: Madison (MSN) mouse strain. Control: outbred hsd:ICR (ICR) mouse strain.                                                                                                          |
| <i>Number in each group</i>                                   | 8 MSN, 8 ICR. All mice were male.                                                                                                                                                               |
| <i>Assay carried out by core or investigator's laboratory</i> | Carried out in investigator's laboratory.                                                                                                                                                       |
| <i>Authors' contributions to qPCR section</i>                 | C. Michael Saul: all molecular work, half of dissection work, writing.<br>Griffin M. Gessay: half of dissection work.<br>Stephen C. Gammie: bred mice, provided funding and lab space, writing. |

Table S2.2 – Tissue Samples

|                                  |                                                                                                                                                              |
|----------------------------------|--------------------------------------------------------------------------------------------------------------------------------------------------------------|
| <i>Description</i>               | Fresh frozen whole hippocampus.                                                                                                                              |
| <i>Volume or Mass of sample</i>  | See table S2.10.                                                                                                                                             |
| <i>Dissection Type</i>           | Gross dissection of hippocampal tissue from brain.                                                                                                           |
| <i>Processing Procedure</i>      | Animals were euthanized by cervical dislocation under isoflurane anesthetic, decapitated, and their hippocampi were immediately dissected from their brains. |
| <i>If frozen, how quickly?</i>   | Samples frozen immediately on dry ice upon dissection.                                                                                                       |
| <i>Sample storage conditions</i> | Stored at -80°C for no more than 12 weeks prior to RNA extraction.                                                                                           |

Table S2.3 – Nucleic Acid Extraction

|                                                             |                                                                                                                                     |
|-------------------------------------------------------------|-------------------------------------------------------------------------------------------------------------------------------------|
| <i>Procedure and/or instrumentation</i>                     | Mortar and pestle disruption, guanidinium thiocyanate-phenol-chloroform extraction, and spin column cleanup and purification.       |
| <i>Name of kit and details of any modifications</i>         | Bio-Rad Aurum Total RNA Fatty and Fibrous Tissue Kit (catalog number 732-6830) used according to the manufacturer's specifications. |
| <i>Sources of additional reagents used</i>                  | Chloroform (Acros Organics, catalog number AC42355-0250)<br>Ethanol (Fisher Scientific, catalog number BP2818-500)                  |
| <i>Details of DNase treatment</i>                           | On-column treatment with DNase I according to manufacturer's specifications.                                                        |
| <i>Contaminaion assessment of input RNA</i>                 | NanoDrop curves used to assess presence of presence of protein, salt, and organic contaminants. All curves indicated clean samples. |
| <i>Nucleic acid quantification</i>                          | See table S2.10.                                                                                                                    |
| <i>Instrument and method of nucleic acid quantification</i> | NanoDrop spectrophotometer, absorbance at 260nm.                                                                                    |
| <i>Purity (<math>A_{260}/A_{280}</math>)</i>                | See table S2.10.                                                                                                                    |
| <i>Yield</i>                                                | See table S2.10.                                                                                                                    |
| <i>RNA integrity instrument</i>                             | Agilent RNA 6000 Nano Chips with Agilent BioAnalyzer 2100.                                                                          |
| <i>RIN</i>                                                  | See table S2.10.                                                                                                                    |
| <i>Inhibition testing</i>                                   | $C_q$ dilution, 1:8 using Ywhaz. As expected, diluted samples ran ~3 cycles behind undiluted samples.                               |

Table S2.4 – Reverse Transcription

|                                                    |                                                                                                                                                                                                                                                                          |
|----------------------------------------------------|--------------------------------------------------------------------------------------------------------------------------------------------------------------------------------------------------------------------------------------------------------------------------|
| <i>Complete reaction conditions</i>                | 500 $\mu$ M dNTP mix, 20mM Tris-HCl (pH 8.4), 50mM KCl, 5mM MgCl <sub>2</sub> , 2.5mM dT 20mers, 10mM DTT, 2U/ $\mu$ L RNaseOUT, 10U/ $\mu$ L SuperScript III RT.                                                                                                        |
| <i>Amount of RNA and reaction volume</i>           | 25 $\mu$ L reactions, 2 $\mu$ g total RNA used in each reaction. 1.25 $\mu$ L RNase H added after reaction termination.                                                                                                                                                  |
| <i>Priming oligonucleotide and concentration</i>   | oligo-dT 20mers, final reaction concentration of 2.5mM.                                                                                                                                                                                                                  |
| <i>Temperature and time</i>                        | Prior to cDNA synthesis, RNA, primers, and dNTPs were denatured together at 65°C for 5 min. cDNA synthesis took place at 50°C for 50 min followed by an 85°C reaction termination step for 5 min. After reaction termination, the RNase reaction ran at 37°C for 20 min. |
| <i>Manufacturer of reagents and catalog number</i> | Invitrogen SuperScript III First-Strand Synthesis System for RT-PCR (catalog number 18080-051)                                                                                                                                                                           |
| <i>C<sub>q</sub> with and without RT</i>           | See table S2.10 for no RT C <sub>q</sub> s. While some gDNA contamination is present, its effect on experiments are negligible and stochastic according to hypothesis testing on no RT controls. This contamination is mostly a source of random error.                  |
| <i>Storage conditions of cDNA</i>                  | Stored at -80°C for no longer than 6 months.                                                                                                                                                                                                                             |

Table S2.5 – qPCR Target Information

|                                                  |                                                                                                                                      |
|--------------------------------------------------|--------------------------------------------------------------------------------------------------------------------------------------|
| <i>Gene symbol</i>                               | See table S2.11.                                                                                                                     |
| <i>Accession number</i>                          | See table S2.11.                                                                                                                     |
| <i>Location of amplicon</i>                      | See table S2.11.                                                                                                                     |
| <i>Amplicon length</i>                           | See table S2.11.                                                                                                                     |
| <i>In silico specificity</i>                     | All primers screened for specificity using NCBI Primer-BLAST.                                                                        |
| <i>Homologs amplified</i>                        | No primers amplified pseudogenes or retropseudogenes.                                                                                |
| <i>Sequence alignment</i>                        | Aligned in NCBI Primer-BLAST.                                                                                                        |
| <i>Location of each primer by exon or intron</i> | See table S2.11.                                                                                                                     |
| <i>Targeted splice variants</i>                  | Each primer set targets all splice variants for every transcript of interest as they are documented in the NCBI RefSeq RNA database. |

Table S2.6 – qPCR oligonucleotides

|                                                   |                                                         |
|---------------------------------------------------|---------------------------------------------------------|
| <i>Primer sequences</i>                           | See table S2.11.                                        |
| <i>Probe sequences</i>                            | Not applicable; dsDNA binding dye chemistry used.       |
| <i>Location and identity of any modifications</i> | No modifications.                                       |
| <i>Manufacturer of oligonucleotides</i>           | UW-Madison Biotechnology Center DNA Synthesis Facility. |
| <i>Purification method</i>                        | Standard desalting and lyophilization.                  |

Table S2.7 – qPCR protocol

|                                                  |                                                                                                                                                                                                                 |
|--------------------------------------------------|-----------------------------------------------------------------------------------------------------------------------------------------------------------------------------------------------------------------|
| <i>Complete reaction conditions</i>              | 2X Bio-Rad SsoFast EvaGreen Super Mix without ROX (catalog number 172-5204) used with no modifications.                                                                                                         |
| <i>Reaction volume and amount of cDNA/DNA</i>    | 20 $\mu$ L reactions; 2 $\mu$ L 1:5 diluted cDNA used in each reaction.                                                                                                                                         |
| <i>Primer Concentration</i>                      | 500nM forward and 500nM reverse primer for all primer sets.                                                                                                                                                     |
| <i>Mg<sup>2+</sup> concentration</i>             | 3.0mM MgCl <sub>2</sub> .                                                                                                                                                                                       |
| <i>dNTP concentration</i>                        | 200 $\mu$ M each of dATP, dTTP, dCTP, and dGTP. 800 $\mu$ M dNTP total.                                                                                                                                         |
| <i>Polymerase identity</i>                       | Bio-Rad SsoFast Taq Fusion Polymerase.                                                                                                                                                                          |
| <i>Polymerase concentration</i>                  | Proprietary concentration.                                                                                                                                                                                      |
| <i>Buffer identity and manufacturer</i>          | Bio-Rad qPCR buffer provided with SsoFast EvaGreen Supermix.                                                                                                                                                    |
| <i>Exact buffer chemistry</i>                    | Proprietary composition.                                                                                                                                                                                        |
| <i>PCR additives used</i>                        | No additives used.                                                                                                                                                                                              |
| <i>Manufacturer of plates and catalog number</i> | Applied Biosystems MicroAmp Fast 96-Well Reaction Plates (catalog number 4346907).                                                                                                                              |
| <i>Complete thermal cycling parameters</i>       | Incubation stage: 30s at 95°C. Cycling stage: 40 cycles, 3 steps: 5s at 95°C, 20s at annealing temperature (see table S2.11 for the specific annealing temperature used with each primer set), and 20s at 72°C. |
| <i>Reaction setup</i>                            | Manual using Eppendorf single channel adjustable volume pipettes.                                                                                                                                               |
| <i>qPCR instrument</i>                           | Applied Biosystems StepOnePlus.                                                                                                                                                                                 |

Table S2.8 – qPCR validation

|                                                             |                                                                                                                                                                             |
|-------------------------------------------------------------|-----------------------------------------------------------------------------------------------------------------------------------------------------------------------------|
| <i>Evidence of optimization</i>                             | Prior to analysis, we ran each primer set at several annealing temperatures. We used the annealing temperature with the earliest C <sub>q</sub> and the highest efficiency. |
| <i>Specificity</i>                                          | Stringent <i>in silico</i> testing of primers prior to qPCR using Primer-BLAST, dissociation curve test of specificity <i>in vitro</i> .                                    |
| <i>C<sub>q</sub> of NTC</i>                                 | C <sub>q</sub> > 40 for all NTCs for all genes.                                                                                                                             |
| <i>Calibration curves with slope and y-intercept (m, b)</i> | See table S2.12.                                                                                                                                                            |
| <i>Efficiency calculated from slope</i>                     | See table S2.12.                                                                                                                                                            |
| <i>r<sup>2</sup> of calibration curve</i>                   | See table S2.12.                                                                                                                                                            |
| <i>Linear dynamic range (LDR)</i>                           | See table S2.12.                                                                                                                                                            |
| <i>C<sub>q</sub> variation at Limit of Detection</i>        | LOD measurements not necessary for relative quantification.                                                                                                                 |
| <i>Evidence for LOD</i>                                     | LOD measurements not necessary for relative quantification.                                                                                                                 |
| <i>If multiplex, efficiency and LOD for each assay</i>      | Not applicable; dsDNA binding dye chemistry used.                                                                                                                           |

Table S2.9 – Data analysis

|                                                                                 |                                                                                                                                         |
|---------------------------------------------------------------------------------|-----------------------------------------------------------------------------------------------------------------------------------------|
| <i>qPCR analysis program</i>                                                    | Relative Expression Software Tool (REST)                                                                                                |
| <i>Method of <math>C_q</math> determination</i>                                 | Used ABI StepOnePlus software to determine ABI's $C_t$ value.                                                                           |
| <i>Outlier identification and disposition</i>                                   | Our experiments contain no outliers.                                                                                                    |
| <i>Results from NTC</i>                                                         | All NTCs have no amplification.                                                                                                         |
| <i>Justification of number and choice of reference genes</i>                    | The combination of <i>Sdha</i> and <i>Ywhaz</i> was found to be the most stable combination of reference genes by Gubern et al. (2009). |
| <i>Description of normalization</i>                                             | Data normalized for baseline fluorescence.                                                                                              |
| <i>Number and stage (reverse transcription or qPCR) of technical replicates</i> | 3 qPCR technical replicates.                                                                                                            |
| <i>Statistical methods for results significance</i>                             | Randomization test for significance.                                                                                                    |
| <i>Software (source, version) of stats</i>                                      | StepOnePlus 2.1; REST 2009.                                                                                                             |

Table S2.10 – Sample quality control

| <i>ID</i> | <i>Strain</i> | <i>Tissue Mass</i> | <i>RNA Concentration</i> | <i>RNA Yield</i> | <i><math>C_q</math> (RT/no RT)<sup>†</sup></i> | <i><math>A_{260} : A_{280}</math></i> | <i>RIN</i> |
|-----------|---------------|--------------------|--------------------------|------------------|------------------------------------------------|---------------------------------------|------------|
| 1         | MSN           | 35.8 mg            | 222.34 ng/ $\mu$ L       | 35.574 $\mu$ g   | 18.20/36.78*                                   | 2.11                                  | 8.2        |
| 2         | MSN           | 36.7 mg            | 248.83 ng/ $\mu$ L       | 39.813 $\mu$ g   | 17.84/40.00*                                   | 2.12                                  | 8.3        |
| 3         | MSN           | 35.7 mg            | 271.41 ng/ $\mu$ L       | 43.426 $\mu$ g   | 18.01/31.40                                    | 1.99                                  | 8.3        |
| 4         | MSN           | 35.8 mg            | 235.50 ng/ $\mu$ L       | 37.680 $\mu$ g   | 17.75/38.96*                                   | 2.12                                  | 8.2        |
| 5         | MSN           | 60.0 mg            | 454.53 ng/ $\mu$ L       | 72.725 $\mu$ g   | 18.09/36.62                                    | 2.08                                  | 8.4        |
| 6         | MSN           | 48.2 mg            | 331.09 ng/ $\mu$ L       | 52.974 $\mu$ g   | 17.88/35.23                                    | 2.11                                  | 8.2        |
| 7         | MSN           | 41.0 mg            | 290.64 ng/ $\mu$ L       | 46.502 $\mu$ g   | 17.83/38.10*                                   | 2.11                                  | 8.5        |
| 8         | MSN           | 46.0 mg            | 263.10 ng/ $\mu$ L       | 42.096 $\mu$ g   | 17.78/38.97*                                   | 2.11                                  | 8.3        |
| 9         | ICR           | 50.7 mg            | 347.06 ng/ $\mu$ L       | 55.530 $\mu$ g   | 18.03/34.77                                    | 2.09                                  | 8.5        |
| 10        | ICR           | 32.2 mg            | 215.83 ng/ $\mu$ L       | 34.533 $\mu$ g   | 17.66/36.45                                    | 2.12                                  | 8.2        |
| 11        | ICR           | 44.2 mg            | 261.85 ng/ $\mu$ L       | 41.896 $\mu$ g   | 17.77/33.17                                    | 2.13                                  | 8.3        |
| 12        | ICR           | 38.2 mg            | 247.66 ng/ $\mu$ L       | 39.626 $\mu$ g   | 17.83/39.20*                                   | 2.12                                  | 8.3        |
| 13        | ICR           | 42.0 mg            | 278.96 ng/ $\mu$ L       | 44.634 $\mu$ g   | 17.97/37.30*                                   | 2.11                                  | 8.9        |
| 14        | ICR           | 37.2 mg            | 274.48 ng/ $\mu$ L       | 43.917 $\mu$ g   | 17.98/38.91*                                   | 2.12                                  | 8.7        |
| 15        | ICR           | 30.7 mg            | 236.85 ng/ $\mu$ L       | 37.896 $\mu$ g   | 17.83/36.06                                    | 2.12                                  | 9.2        |
| 16        | ICR           | 43.3 mg            | 288.02 ng/ $\mu$ L       | 46.083 $\mu$ g   | 18.02/35.53                                    | 2.12                                  | 9.4        |

<sup>†</sup>RT versus no RT data were collected using the reference gene *Ywhaz*.  $C_q = 40$  indicates no amplification detected.

\*No amplification was detected in at least 1 of the replicates in these no RT controls.

Table S2.11 – Primers

| <i>Gene Symbol</i> | <i>RefSeq Accession</i> | <i>Primer Sequence (5'-3')</i>                           | <i>Product Length</i> | <i>Amplicon Location</i>            | <i>T<sub>m</sub></i> |
|--------------------|-------------------------|----------------------------------------------------------|-----------------------|-------------------------------------|----------------------|
| Ywhaz              | NM_01174                | F: TCCTTATTCCCTCTTGGCAG<br>R: ATGGAAGCTACATTAGCGGTTT     | 92 bp                 | Exon 5; 2432-2523<br>(3' UTR)       | 58°C                 |
| Sdha               | NM_02328                | F: CCGTCCTACTGATGAAACC<br>R: GCGCAACTCAATCCCTTAC         | 179 bp                | Exon 12; 2015-2193<br>(ORF, 3' UTR) | 58°C                 |
| P2x7               | NM_011027               | F: CGAATTATGGCACCGTCAA<br>R: TCTCCGTCACCTCTGCTATG        | 150 bp                | Exons 1, 2; 234-383<br>(ORF)        | 57°C                 |
| Epor               | NM_010149               | F: GTCCGATTCTGGCATCTCA<br>R: GGACAAGGCTGTTCTCATAG        | 107 bp                | Exon 8; 1519-1625<br>(ORF)          | 58°C                 |
| Fhit               | NM_010210               | F: CAAACGATTCCCAAGGCATAA<br>R: GGGTACAATAAAGAGTGGTTAG    | 89 bp                 | Exon 7; 697-763<br>(3' UTR)         | 58°C                 |
| Cmklr1             | NM_00815                | F: ATCTTACACCATCATGCCACG<br>R: GTATACACACTGAAGCAAAGAGC   | 95 bp                 | Exon 3; 2003-2097<br>(3' UTR)       | 58°C                 |
| Npsr1              | NM_175678               | F: GTAGAGGAGCCAATTAACAAGTA<br>R: TAGACCAGAACTTGACAGAGAT  | 106 bp                | Exon 10; 2866-2971<br>(3' UTR)      | 57°C                 |
| Tac1               | NM_009311               | F: ACGCACTATCTATTCATCTTCATC<br>R: AGAATTACAAGGCTTATTGGCA | 167 bp                | Exon 7; 502-668<br>(3' UTR)         | 58°C                 |
| Cat                | NM_009804               | F: TTCCCACTTGGATTATGTTGATG<br>R: CTGAAAGCAACCAAACACGG    | 119 bp                | Exon 13; 2358-2476<br>(3' UTR)      | 56°C                 |

Table S2.12 – qPCR quality control

| <i>Gene Symbol</i> | <i>PCR Efficiency</i> | <i>Linear Dynamic Range</i>  | <i>r<sup>2</sup></i> | <i>Slope</i> | <i>y Intercept</i> |
|--------------------|-----------------------|------------------------------|----------------------|--------------|--------------------|
| Ywhaz              | 98.375%               | C <sub>q</sub> : 17.60-27.71 | 0.998                | -3.362       | 25.020             |
| Sdha               | 97.271%               | C <sub>q</sub> : 17.97-28.19 | 0.998                | -3.389       | 25.472             |
| P2x7               | 96.354%               | C <sub>q</sub> : 27.06-33.29 | 0.989                | -3.412       | 34.583             |
| Epor               | 99.573%               | C <sub>q</sub> : 25.42-31.47 | 0.998                | -3.332       | 32.743             |
| Fhit               | 104.902%              | C <sub>q</sub> : 26.25-33.86 | 0.990                | -3.210       | 33.346             |
| Cmklr1             | 98.375%               | C <sub>q</sub> : 27.92-35.92 | 0.994                | -3.362       | 35.382             |
| Npsr1              | 99.305%               | C <sub>q</sub> : 30.68-34.69 | 0.989                | -3.339       | 38.136             |
| Tac1               | 97.414%               | C <sub>q</sub> : 23.69-29.79 | 0.997                | -3.385       | 31.181             |
| Cat                | 97.228%               | C <sub>q</sub> : 28.24-34.31 | 0.987                | -3.390       | 35.793             |
